# Supplementary material for: The role of the zinc finger protein ZC3H32 in bloodstream-form Trypanosoma brucei
Source: PubMed Central journal article supplement (PMC5435347; doi:10.1371/journal.pone.0177901), 2017-05-17

## A. Alignment

Tb9 M S G T N H L R Q V P A A V Y N P I P P A P P F M V F C D P Y ----- A K V A N A T A K Y R N Q P P V A P N A A ----- A V F 56  
Tco M S G S G N P R Q G H P V A G Y R D P L S S A Q S V M M F C G T N ----- M S S G V P I S F R S H S H V T A N P A ----- T V F 57  
Tv M L G N I P L Q K S F H S P G V P N P R A P L Q T L M M Y D V Y ----- P K T S T V A T G F A N T A A V A A V P ----- A A F 56  
TcM M F G S E Q F R Q R F P V G G G S N P A A A A T P F M M Y G V C ----- P K T N C V A S N Y S N Q P Q V T T N N ----- A A F 56  
Lmj ----- M I Y K A Y G S P -- E N N S G N T H M Y S M Y A P P N ----- A Y V C Q Q G S R T M Y G Y A G T G G H G S G H P -- F G Y H A N P S M G V T 64  
Emt M Y G D Q K M M Y N V Y G T L -- A H S G N N T Q M F S T Y A P L N ----- A Y G S G H G G S M M Y D Y A V T G G Q G T G Q P -- Y G Y H T D P S V G A T 70  
Cf M Y H G S D G M Y N V Y S G H G N T N S G A G N G Q Y S M Y N N H N G G G M Y G N V P G M H N S P M M Y V Y G N A G N S S P S A A G G Y G M R V D P A V A A S 80  
Ang M M D N T F Q Q T S Y Y F D P --- S S M N N G N G N F Y V S N N ----- N P G M N G I P M S N V N Q Q N G A F G T --- F A F S P N N N T N A L 63  
Bs M Y Y G G H E D L G T F V V Q S S T N Q Q Q Q Q Y G R N N G G G G G R G R R G G G G G G P A E F S A A R N V Q V M P N P T A Y I A G G - Q M N W G T P M T 79

Tb9 Q Q Q L Y S L P F H G V A G V P A P M R E E ----- E D A D G S F E V H D S C L K A P I T V G R R V V 103  
Tco Q P A V Y G Y P L P G V G S L P A P I R E D ----- D D A D T P F E A H D N H L K A P I T V R R N V V 104  
Tv T H R L Y G T P V S A L T G L P S A A F D ----- E D A G G S F E V H D S H L K A P I T V Q R S V V 102  
TcM - Q R P Y G F P V N G Y G A T S T A P H E E ----- E D T E G L F E V H D S H W K V P I S V H S S V V 102  
Lmj Y E Y N G G I N V H H N G S A Y R V G --- G G T N ----- G R D R G G D V V S L R N --- L H G Y D Q Q A T S D Y E V H D N Q L K A P V V V T P A T V 130  
Emt Y E Y T G G N N V H S V G G V Y R V Y G A R V G G T N ----- G C A R V G D T N G A R N --- L Q G Y D Q P A T F D Y E V H D N Q L K A P V V V T P A T V 140  
Cf Y E Y N G --- I N H I G G G R G R G R G A G G Y N T S P M H P A H A R R G G S N F F R G G G G G N G Y D Q Q A P S D Y E V H D N Q L K A P V A V T M E T V 157  
Ang M A S N N N I S T N S V G N T S V M S S N N P N L N N N N N M G F P M Q M G M Q M N Q V W T P I V S G N N T A F Q G E F E V H D S Q L K A P I T T I R P T D V 143  
Bs F T T Q Q Q Q L P H H Q Q Q Q Q Q H H F S P S R G N G G G G G G G H N N G G G G F D G M G S P A P S N G G D D V V E V H D N H L K A P V S V R R E D V 159

Tb9 I P T T I G S R G L F N C A Q L P S N G S G G N C N N N S N S N G N G G K S F A R I C D A H P E G R C I S G E Q C P D I H V Q A E Y L T A Q R Q E M I F W L E S 183  
Tco F P T A G S R A L F N P Q Q R -- N N G A G G -- N G N --- V G G R N F I R I C D L F Q E G R C L S G A L C L D V H V R S D Y L N S Q R Q E M L R W L A S 175  
Tv F P T L G S F G L F R S S Q N --- G A N N --- N --- A G G R S T A R I C D L F H E G R C A S S E S C S D I H V H P E Y L V S K R Q E M F S W L E N 169  
TcM S P S V G S R L L F S S Q H P --- T A G --- P G S R S V V R V C E N F Q E G H C V L G E N C N D I H L H P E Y L M A K R Q A M I S W I H S 167  
Lmj V S T L G S A R L F S K P P K --- P --- I V Y G S R C V V R I C D A F Q E G R C A A G D R C H D I H V R P E Y L A E T R M E M S S W L F D 195  
Emt V A T V G S T R L F S K P P K --- P --- I V Y G S R S V V R I C D A F Q E G R C A S G E R C H D I H V K P D Y L T Q T R L E M S S W L C D 205  
Cf V P T I G S R L F S R P P K --- A --- I V Y G S R S V V R I C D A F Q E G R C L A G E K C H D I H V R P E F L A D T R M Q M S S W L M D 222  
Ang I A T A G S Q R L F S N G T R --- Q --- I V Y G S K N M F R I C E N F Q E G N C L S A N - C P E V H V N P E Y L K Q T R Q A L T T W L Q E 207  
Bs E E T I G S Q R L F S A P A Q Q L N S A T A T --- G P Q R N A P R I C E P Y Q Q G Q M S G D E C P D V H V D V N V L Q G I R S Q M V T W L N A 229

Tb9 K E R E F Q N T L R A D P T K M F R V F C A D L K E A V E V P I S A L Q F T K G L Y V D P S V R A R R A R A G H Q N Q F A M L A S Q L P T A C G L F L S N P S Q 263  
Tco K E E F V M T L R V D P E R I F R V F C A D L K E T I V D V P I A A L Q F T K G L Y V D P S V R A R R A R G G H Q N Q Y A M M A S Q L P T A C G L F L M D P S Y 255  
Tv S E K E F Q N T L D A D P N K N F R V F C A D L K E I V S V P I S A L R F T K G L Y V D P S V R A R R T R G G H Q N Q Y A I L A S Q V P T A C G L F L L V P S Q 249  
TcM K E R E F Q N T L I H D P R K V F R V F C A D L K E V V E V P I S A L R F T K G L Y V D P N L R A R R A R S G H Q N Q F A V M A S Q V P T A C G L F S E D P S Q 247  
Lmj R E C E F R Q T M E M D S E K T F S I F V A D L K E V V E V P I N S L V F T K G L Y V D P A T R A K R A R G A G N H A H V H A M M Q V P T S G L Y S T D P L Q 275  
Emt R E C E F R K T L E T D A E K T F S I F V A D L K E V V E V P I N S L V F T K G L Y V D P T T R A K R A R S A G N H S H V H A V M Q V P T S G L Y S S D P H Q 285  
Cf R E N E F R Q T L E T D P A K T F R I F V A D L K E V V E V P A S L V F T K G L Y V D P T T R A K R S R G V G N H A H T H A V M Q V P T S G L Y S S D P A Q 302  
Ang K E N E F N R D F V H H P D K L L K T F V A D V K E I V E V P I S A L V F T K G L Y V D P S T R F K R T R G V A P S Y N A A I A A Q V P T G C G L Y S S D P T Q 287  
Bs K E G E F N N T A L E A P D T S F R V F A A D L K E V V D V P I A A L S F T R G L Y V D P S A R A K R S R Y G Q C S A F A L M A A Q V P T A C G L H S V D P A Q 309

Tb9 C R W A R W C N Q I H V D F T W M Q T K K K E F E S W F N E L E G R F N A L P D D Y E F H V H D P Q L K M G L R I P K A S I A V F S R G L F Q G S P K K A P S V 343  
Tco C K W G R W C N Q I H I E I S W M Q S K K R E F E Y W F N G L E S R F N D L P P D Y E F N V H D P Q L K T G L R L P K A S I A V F S R G L F Q G S L K K A P S V 335  
Tv C K W G R W C N Q I H I D A G W M Q S M K K E F E L W S N K L E V Y F N S L P P Q Y C F T V H D P Q L K A S L S L P K A C I S G F S R G L F Q G S A K K A P S V 329  
TcM C K W G K W C N Q V H I E Q G W M Q F K K N E F E S W S N G L E R R F N E L R P D H L F S V H D P Q L K T T L S L P K A S I A G F S R G L F Q G S A K K A P S V 327  
Lmj C K W E R W C N Q V H I D H R W M Q V K K A E F D Q W F I E L Q N R Y F S L A P D D T F T V H D P Q L K S S I S L P K F S I A G F S R G L F Q G S M K K L A S V 355  
Emt C K W E R W C N Q V H I D H R W M K A K A E F D E W F I E L Q N R Y F A L S P D E T F T V H D P Q L K C S T V L P K F S I A G F S R G L F Q G S A K K L A S V 365  
Cf C K W G R W C N Q V H I D H Q W M Q S K K E E F D H W F N E L Q S R Y F N L A P D D N F T V H D P Q L K T S I S L P K F S I A G F S R G L F Q G S M K K L A S V 382  
Ang C K W G R W C N Q V H I S P D W M K S K K N F D S W F D E I E G T Y L S Y P P E H L F T V H D P Q L K R T L Q I P K W S V V S F S R G L F Q G S D R K A P S V 367  
Bs C K W G R W C N Q A H I D P N W M R N K R G E F E N W S K S L E Q R F E E M P E E H T F V V H D P Q L K A S L Q V P K M A T A G F S R G L F Q G N F K K A P S V 389

Tb9 C M L F Q R R R C T A N V C C N Q I H V I P R Y L A L H R L L I Q K G D S I T E E E -- R G N I M N Q M K E I L E S -- Q K R S M Q V A D D G D A N F L A R E L 419  
Tco C M L F Q R N R C T A N V C C N Q I H V V P Q Y L N L Y R R L V Q R G D S L T E A E -- R A E L T S E M N M V L E S Y R Q D R P L Q G G D G N D V S S I A R R L 413  
Tv C M L F Q R N R C T A N A C C N Q I H V V P E Y L N L R R R L A Q N T E M M A E E -- R D E L V R Q M E A I L N S I E -- C N R G S G V N N D V I T A A H K D 404  
TcM C M L F Q R S R C T A N T C C N Q I H V D P S Y L Q L H R R W C N G E Q L P E E K -- R R E L W E Q M S V L E S L L S R C E R E A V A T N D M Y D P A R E L 405  
Lmj C L L F Q R G K C T A G S C C N Q I H V F P Q Y L S L A R E F A M E Q S P D A L P E E K Q R L R R E M E L L R G P L M K Q E K Q E ----- T A A M E S A 428  
Emt C L L F Q R G K C T A G S C C N Q I H V C P Q Y L N L V R E G A L M E Q S P D A M A H E S Q R L R H E M E L L R A P L I E K Q L Q E Q R E A R - Q A M A R E P L 444  
Cf C L L Y Q R A K C T A G S C C N Q I H V V P Q Y L S L A R E Y A T L E Q S P D A P P E E K Q R V A H E M A A M R G P C V E Q Q L R E Q Q E A E R A A A E L Q A V 462  
Ang C L L F Q K S R C T A G A C C N Q I H V S T H Y L N L V R T H A N N M A Q V A T T D G Y D P A Y K N E L D Q L M E T L T A V Q K E ----- E Q K 436  
Bs C M L Y Q R G R C T A G S C C N Q I H V F P E Y L V L L R Q Y T A E P T Q E L F F T M Q Q V A M Q Q K I F L M Q Q R Q S A I Q N A A A S G S L N P G A R P F 469

Tb9 NPQA-----VPIVPP--QPTS-----VVRTG-----GSAGSSSPRTAAAPI--- 454  
Tco NPQA-----TPYTPQPLSPTTGSP-----SVWRSG-----NPSDNKERKQTPRS---- 452  
Tv FLSA-----PASVSAMTSRVDPGN---GMDNCVESIRLGLPLSQGVGEG---TQWQS-DSAPAPSTCPVDA--- 463  
TcM NPQA-----QPFVPSPLS SPQPA EKIMGETGAKRKEKMKVDACQVKGEKGTISFASRQSRNHFPDYPCST--- 471  
Lmj SLPN-----VVSSANEGTHSDAMD-----IKAAAEEDLASCGALFEHVQVQDEDEVEPVSHLVSANTS 484  
Emt PYPS-----VVS LPNKESQESSVD-----VQATAEDDLGCSGPLFEHVQVQDEDEVEPVSHLVSANTS 500  
Cf QVYP-----SDQMASEDVS GGTGN-----GNGPLEDELGSSGALFEHVQVQDEDAEVPVSHLVSANTS 518  
Ang RRAE-----REQEKAQKTKEEKKK-----KEETATRDDGES--LFEYIAVDDEADVETSRSPP--- 487  
Bs VPPGGGGGGMGGGGMMGMPQAMNMAAPGGMFAPMMGMMLVPMMPAQDPPSSATGISPYGSHSVTPQHQVDFDQQQ-- 547

Tb9 -----PVPEPLPTFRQPPQWNEHSPSAAVDGS PYASPHRRVERCGSSGTRDLHTCSNPL-----EDLIEFVD-GDKS 520  
Tco -----ASPIRIPSPFPSSVLATRDRITINADNCDHALPPQDIVGRSSPIFRG DVGCSNPS-----EDLVEVVD-GDHS 518  
Tv -----GVKNTFGSTHWPCSATRTLTPVHENHSMIDIGASSVGDADGR--LLSSTTVVNEGQ---L DLGADLMTVVE-EEQL 532  
TcM -----EIEIVCTPMKSGQMVSTGTRSSQHHQQQEGSNKNVSANGTNGINSRARNNNSAGAFPLG-EFMTVVDGERS 544  
Lmj LTRRMNASAPDISLSVARHMNSDGSYSFNYPYGSVTS LPDGSTSFNRFPGTRG-SGQPMDGNGSVQYTPGSVQLLSTDTKG 563  
Emt LSRRLNTSAPDINLLAARHVNSDGSYSFNYPYGSVTS LPEGSTSYNRFPGTRG-SGHAVDGNSTTQFTPGNVQLATGSKG 579  
Cf LTRGLNASAPDINLSSGRHVNSDGSYSFNYPYGSVTS LPADESTYGRAPMGRGACVPMESSGVVQYTPGNVQLHSTGVKG 598  
Ang -----HADGNSSKAGSKKSAGGSYSNPNYS--GSLTDLDFQN--PIVIGG---VPTERNANSVSSFKRTPAASLTCSG 553  
Bs --Q--QQHRQSPTTIVSPSSVQQQYYPQHQHQQQQPHQSSAGNDSFYRKP HHHELGSQEPLVQFTPTHDDVVEEHRA 623

Tb9 RTSLLAS-----QSTTSQASRSCKHTNPNYAFGASYKCTASPTFGWVQPVY----- 566  
Tco YSSHPAS-----QSVSSPNCRSTRHTNPNYAFGGNSRCTASPVFGWVQPIR----- 564  
Tv QSSLQAS-----YTNM-YASKGLRRLNLCGQPGVATCTASPTFGWVQPVH----- 577  
TcM QSSLQAS-----HSNIS HAGRSYKHTNPNYTFGGSSSCAASPSFGWVQPIR----- 590  
Lmj MRRLVAL-----VSPESSNGAVELHRNGDDMGIGGNAGDGTATVAHDRAPPFAAGHRSNNGYRAVAHPLGDEGGR 634  
Emt IRRLVAL-----VSPELGSMTAEHRNGEENVLSGNTGDSGFSGGAADMAH-VAAMHRNSNGYRAKAHVSGSDGRR 649  
Cf GRRLVAV-----ISPETSSMTEVHR-MDEMGTSGTVDGAGPASMMDRHAY-APALLRSGGGG-GGAYRAAMHHR- 665  
Ang EVAVTSS-----LSTHHQTSHTTATVQAEEGHPEEGDPLQGRSVTSDERGR----- 599  
Bs SASLSSSPNLGPKSPASVTSIRQVLSIPYKRSNLADLRPDNDEVFDRHRTSVVGSVGGGGAPQPSAHNSNSGNAQ 703

Tb9 -----SAANSSTHPAN-----RSWSSG SVTGGCQPIRV---RVGGGGIMEHEPLEPFLSDQHDMGASPFEC-RS 627  
Tco -----SAVNSLTMPVPT-----SSWCNDSGTSNPNVFPQG---RTEDDSTAHEGAQPFSLDRHDLEADTFDCGVV 626  
Tv -----SAGNSITNPMN-----LSCGNSEMLSKTSS-----ASPVHSDSCALAMMSPLMGGQHGAPDMFSG-FS 636  
TcM -----SAGNSCTTMPN-----SCCGAENGGNNGGNGVWGMRTKADPSPAAADNRSTLFGAHHEFDNSFCA-LS 652  
Lmj YDSGTQGEQSSSLHPLDFDASWHFSPTPLLCFDASTTSTHRNG----SIRDEDPAMHAHLRLTASNSSYIYPGSSTTSQQ 710  
Emt CDGVAQGEQSSSLQPLDFDASLHFSYPLLLCFDASTTSTHRNG----SLREEDPFMHAQARQAASTSSYPYPGSSTTSQQ 725  
Cf -DGASAHQSSSLHPLDFDASLHFSPLLLNFDASNTSLYRNA----STREEETANSLHMLAASNTSASAYAGNSTNSHP 740  
Ang -----SVT-----KVGEASATSWTNLRFNFDSVDTYPSVTNGPIP 635  
Bs QVNLQNSFTSNASSPMKRNNPYQAAQKPTVPPSPLHAAMPPPAQTVSNNMPHTPPMQFSSWAPPSRMPPSMAIPPS 783

Tb9 P-----AHRTLGSRTIE-----DRLSSSP TWSATQKQR----- 655  
Tco P-----PTSGMVFHTGE-----DSPGSSPT----- 646  
Tv P-----PSLHLSLTNAS---FRALDCTECVAEESLVAPTY----- 668  
TcM PSFQWNASGSTPAKTIEELQKVSPDMDHANAEENGFLGTPASGSTPAKTIEELQKVS-----PDMDHTNAEENG FLETP 726  
Lmj N-----LLSTPMHRGVTSNATTAARVRLAASAASSRTHAHS---ATSLPDSSTTNPAMGGSVSSM 768  
Emt N-----LLFTPMQRGLPSNATGAVKVRLAANAAPRTHLRS---ATSLSDAFNTTLMGGSVSS-- 781  
Cf -----YMMTPAQQSTALNASKSRYNPPTTAPMRTRPSPAAAGNMSSEIATPPFSAHMSGSAHSN 800  
Ang G-----SPLGEITRGADNYSI-----GFLETP----- 651  
Bs PFRGPGSSMSN-----LPTSPHQGPHNTFPDMSHVQFSASPLMQPADSLTHLPALRNLTLDNFDDFHLQQSMHGLSLTH 858

Lmj PTARPTFVGEQLTGTR 784  
Emt -GTKLTPTGEPSSGTG 796  
Cf PSARPAVVGDDNSGR 815  
Bs HPGSSALGMSGGIPPAYQNGSFSSGPHLAGHAANVRQSQPYHHHSNQ 907

■ CCCH ■ MKT1-binding ■ Phosphorylation  
At least 5 match:  
■ Template group (chemical)  
■ Template residue

**B. Tethering screen results**

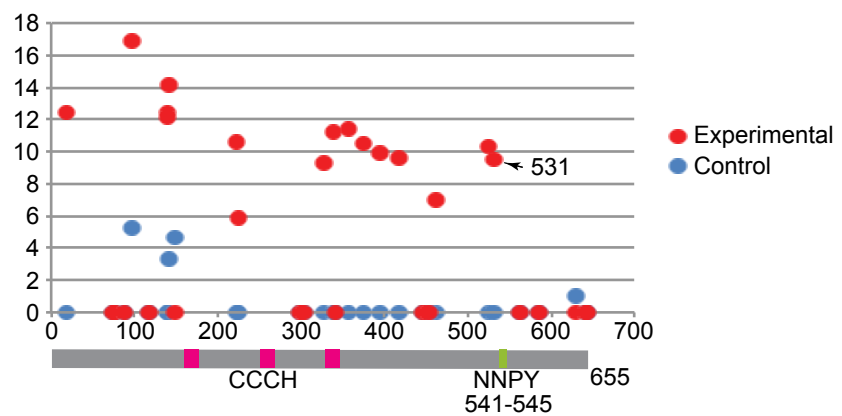

## C. Structural predictions

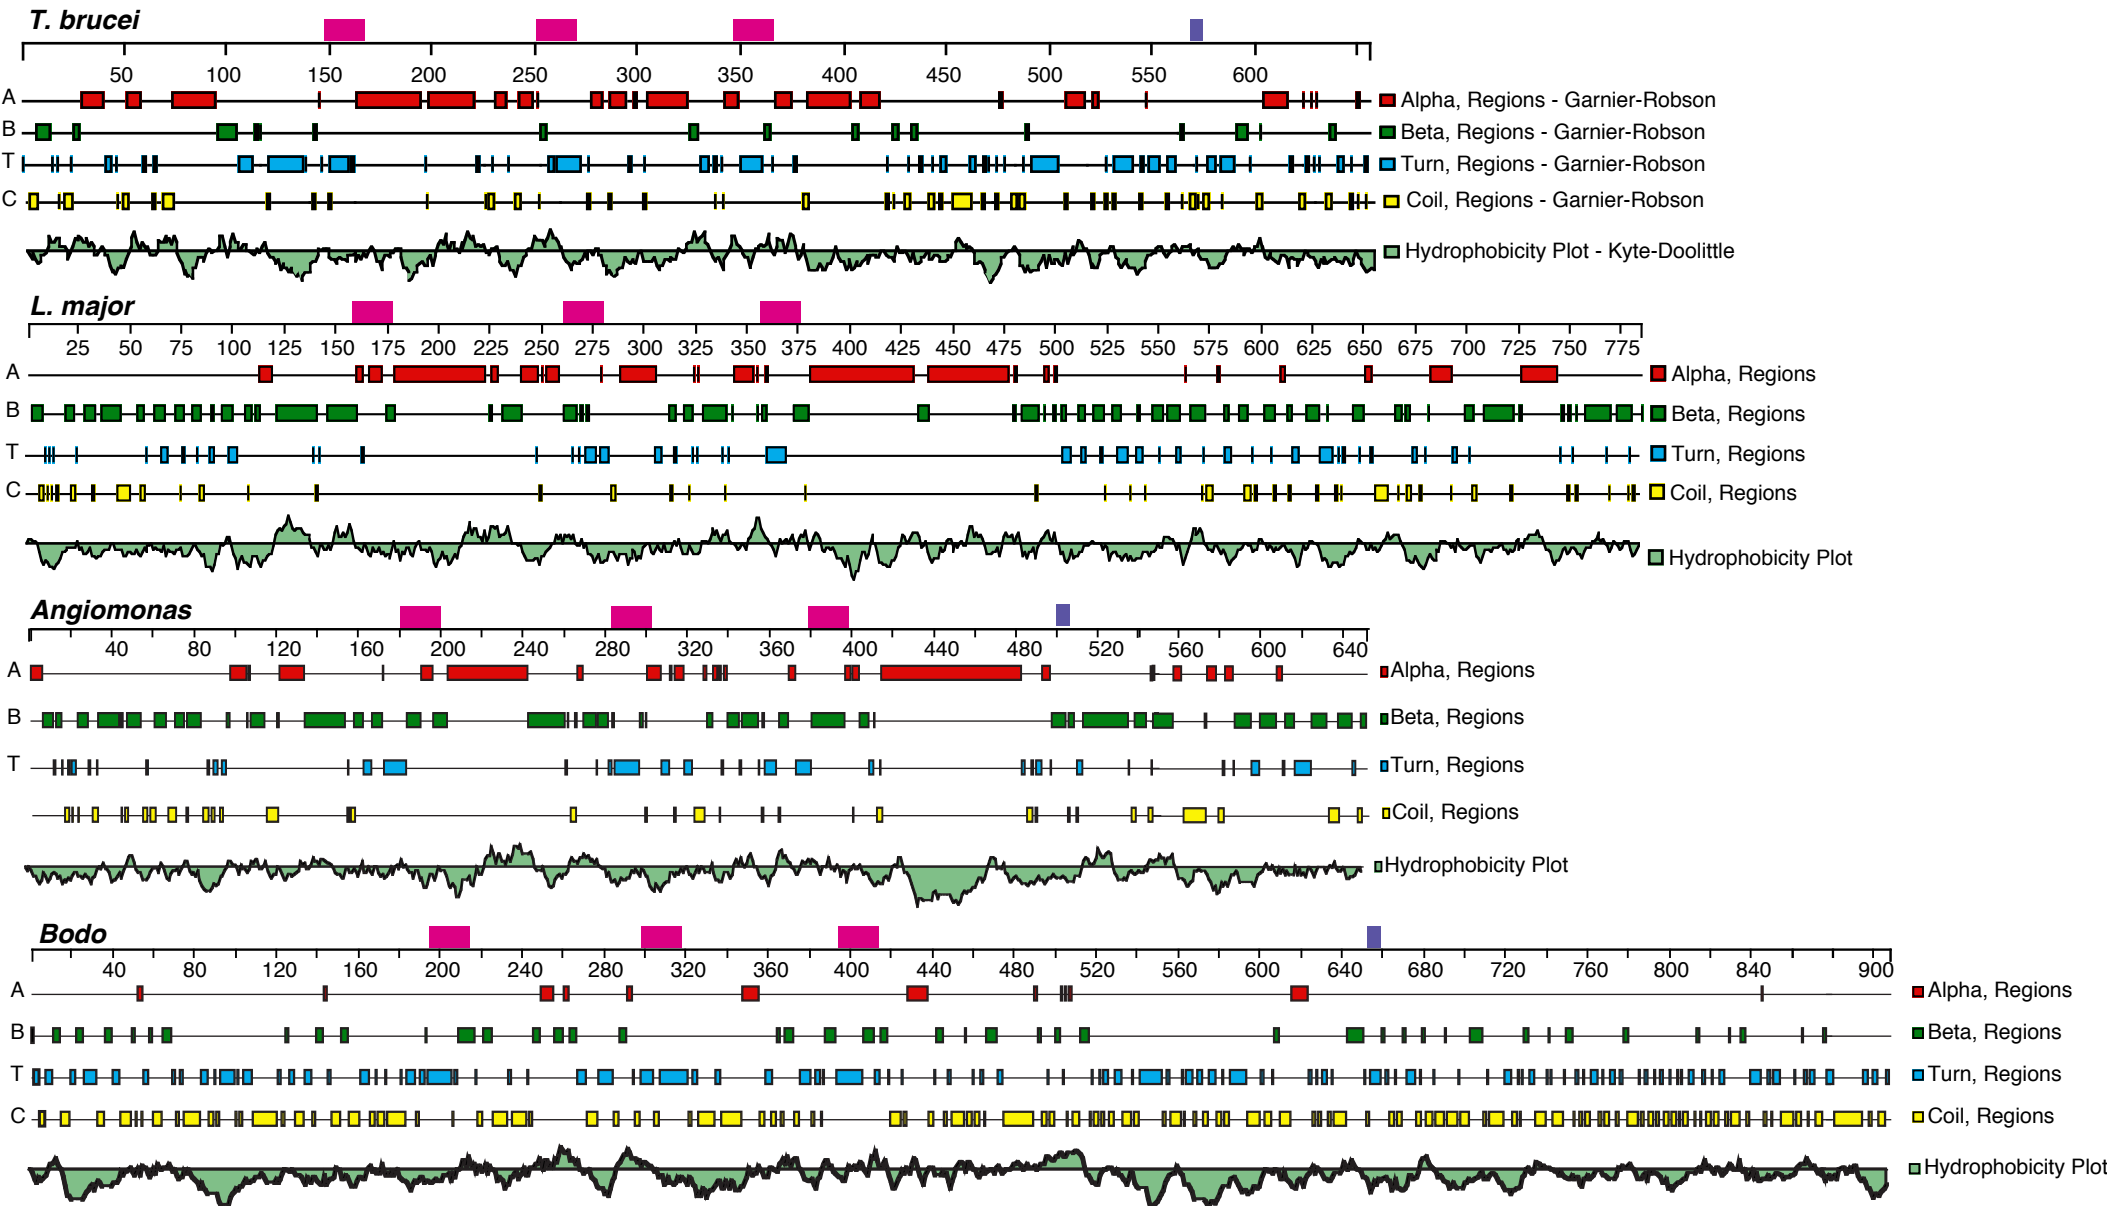

Supplement: pone.0177901.s001.pdf [file pone.0177901.s001.pdf]
