# Supplementary material for: The role of the zinc finger protein ZC3H32 in bloodstream-form Trypanosoma brucei
Source: PubMed Central journal article supplement (PMC5435347; doi:10.1371/journal.pone.0177901), 2017-05-17

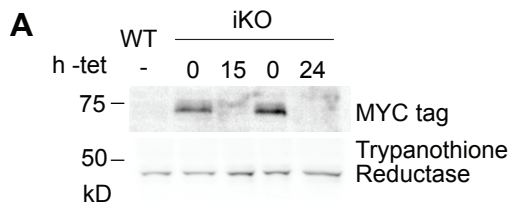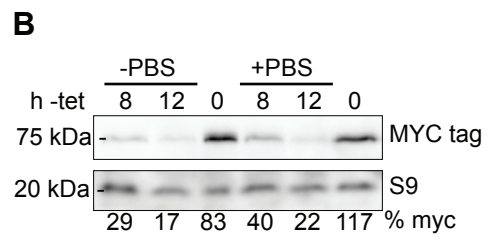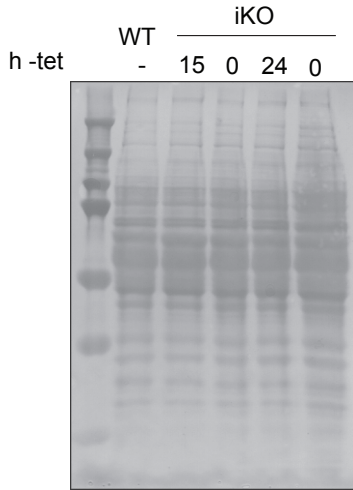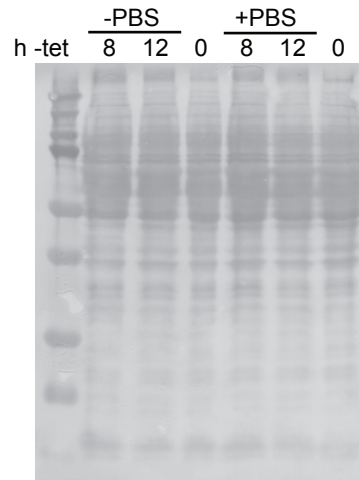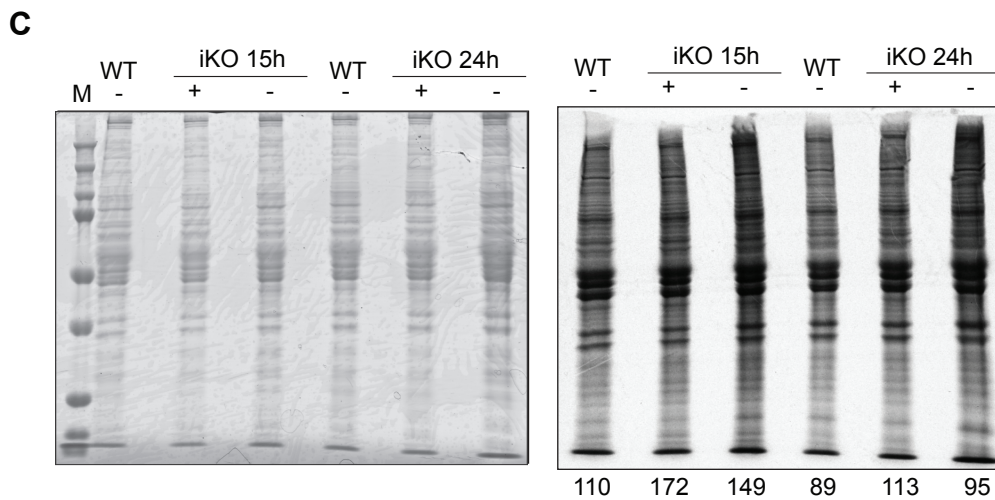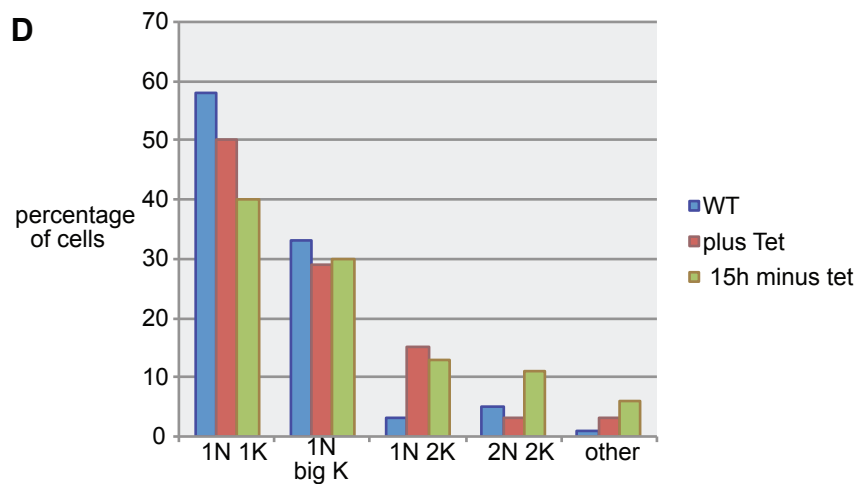

Supplement: pone.0177901.s003.pdf [file pone.0177901.s003.pdf]
